# Supplementary material for: Surfactantless photochemical growth of Ag nanostructures on GaN epitaxial films with controlled morphologies and their application for SERS
Source: Royal Society of Chemistry journal article supplement (doi:10.1039/c1jm13928b), 2011-12-16
Supplement: c1jm13928b.pdf [file c1jm13928b.pdf]

## Supporting materials

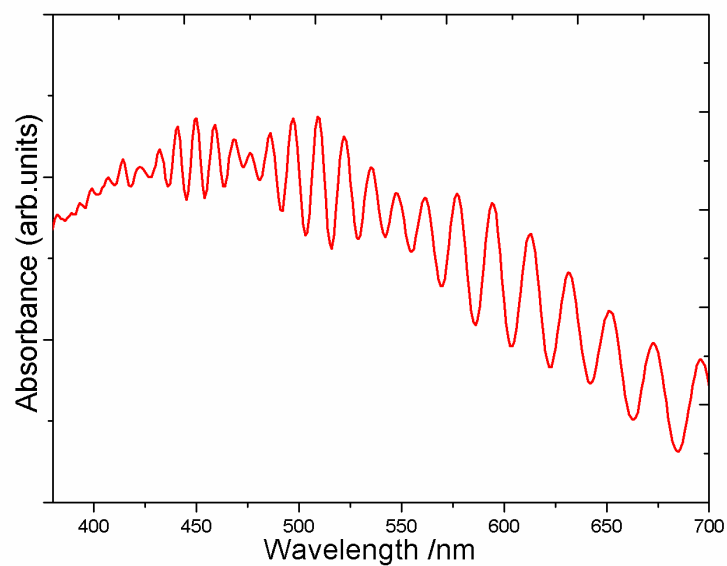

Fig. S1 Near ultraviolet-visible spectrum of Ag NPs deposited on the n-type GaN film after reaction for 5min.

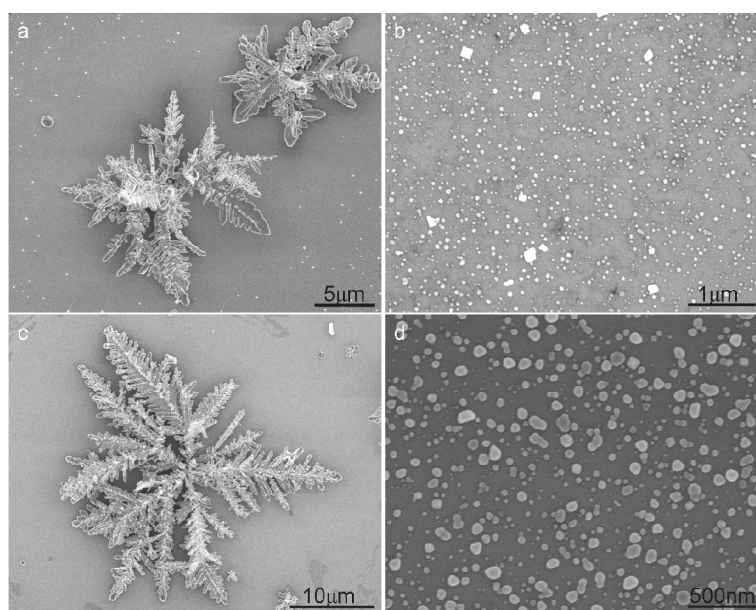

Fig. S2 SEM images of the Ag nanostructures formed on n-GaN after photochemical reaction with 0.01 M AgNO<sub>3</sub> solution for: (a)-(b) 1 min, (c)-(d) 2 min.

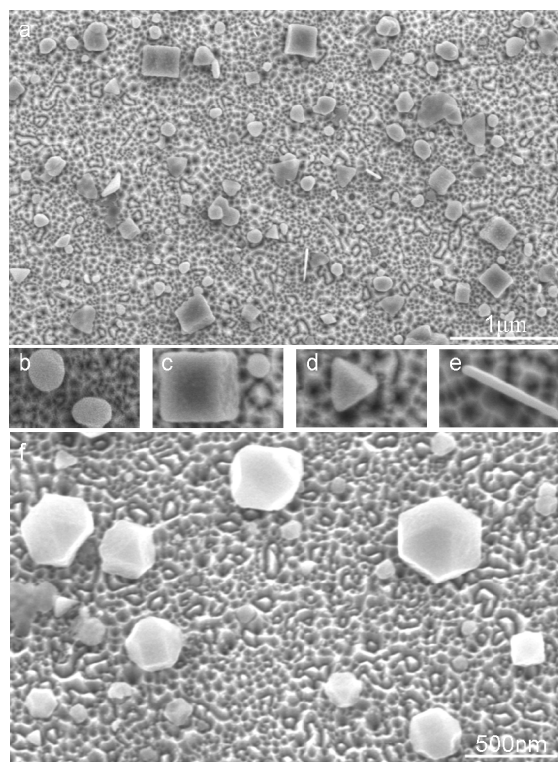

Fig. S3 SEM images of the Ag nanostructures formed on InGaN/GaN MQWs after photochemical reaction for 5 min in (a)-(e) 0.1 M AgNO<sub>3</sub> solution. (f) 0.2M AgNO<sub>3</sub> solution.

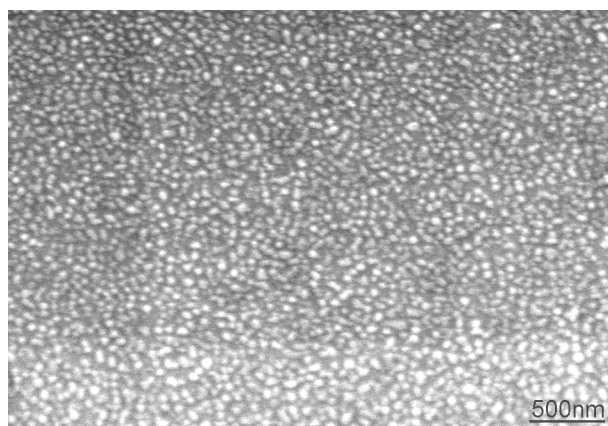

Fig. S4 SEM images of the Ag NPs formed on n-GaN ( $n_0=7\times 10^{18}/\text{cm}^3$ ) after photochemical reaction in 0.1 M AgNO<sub>3</sub> solution for 1 min.

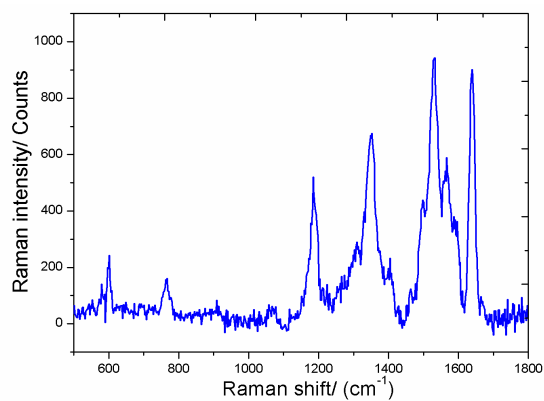

Fig. S5 Raman spectra of the R6G molecules absorbed on the Ag NPs regions that closed to dendrites as shown in Fig. 5.

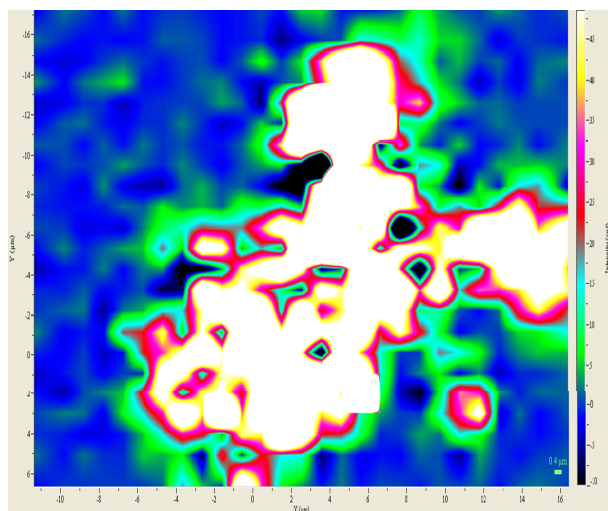

Fig. S6 SERS mapping at 1182cm<sup>-1</sup> of the sample shown in Fig. 5.
